# Supplementary material for: Human Wnt/β-Catenin Regulates Alloimmune Signaling during Allogeneic Transplantation
Source: MDPI journal article supplement (doi:10.3390/cancers13153798), 2021-07-28
Supplement: s1 [file s1]

# Human Wnt/ $\beta$ -catenin Regulates Alloimmune Signaling during Allogeneic Transplantation

Mahinbanu Mammadli, Rebecca Harris, Sara Mahmudlu, Anjali Verma, Adriana May, Rohan Dhawan, Adam T. Waickman, Jyoti Misra Sen, Avery August and Mobin Karimi.

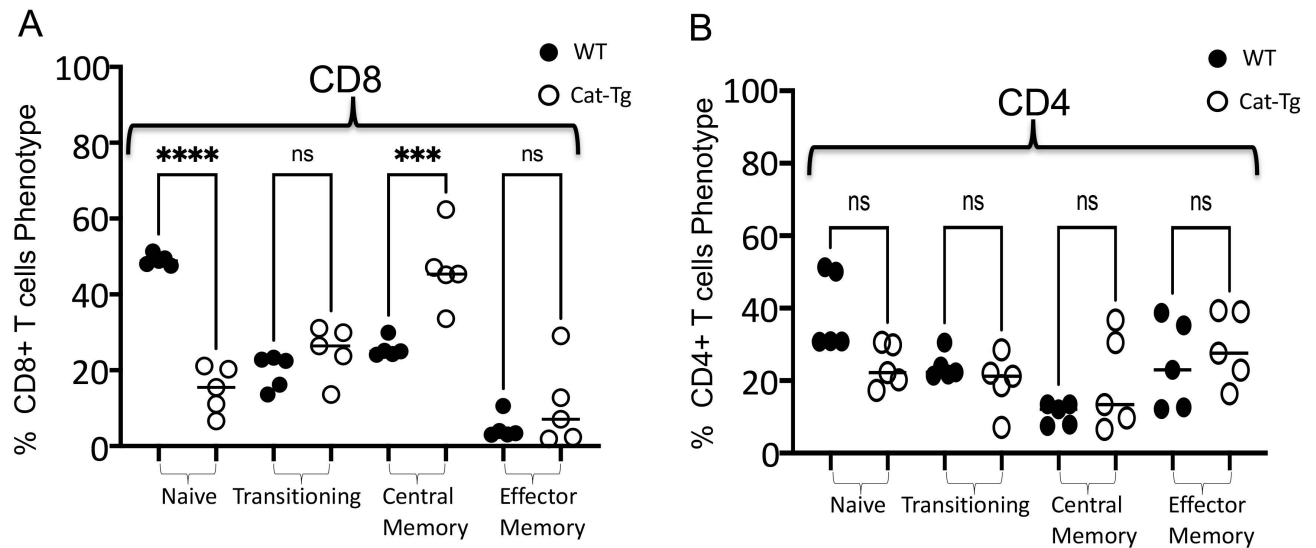

**Figure S1. (Related to Figure 2).** T cells from Cat-Tg mice exhibit enhanced T cell IMP phenotypes (A–B) Quantitative analysis of T cells from WT and *Cat-Tg* mice that were examined for effector memory, central memory, transitioning/activating, and naïve population frequencies. CD4 (A) and CD8 (B) T cells were examined for these populations by flow cytometry. Statistical analysis was performed using two-way ANOVA, one-way ANOVA confirmed by Student's *t*-test, p-values are presented. Symbol meanings for P-values are: ns -  $p > 0.05$  = \*  $p \leq 0.05$  = \*\*  $p \leq 0.01$  \*\*\*  $p \leq 0.001$  = \*\*\*\*  $p \leq 0.0001$  ( $n = 5$  mice per group).
